# Supplementary material for: Demographic and genetic factors influence the abundance of infiltrating immune cells in human tissues
Source: PubMed Central journal article supplement (PMC7200670; doi:10.1038/s41467-020-16097-9), 2020-05-05
Supplement: 41467_2020_16097_MOESM19_ESM.pdf [file 41467_2020_16097_MOESM19_ESM.pdf]

# GeneMANIA report

Created on : 20 August 2019 11:29:16

Last database update : 13 March 2017 00:00:00

Application version : 3.6.0

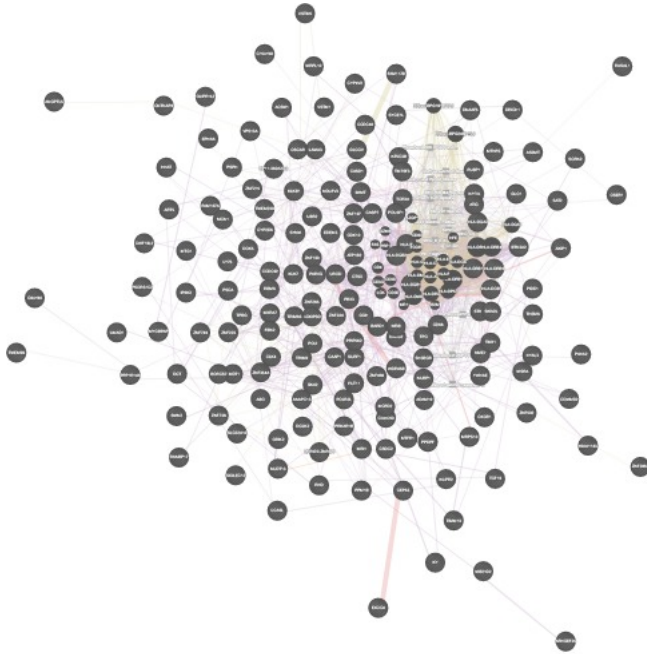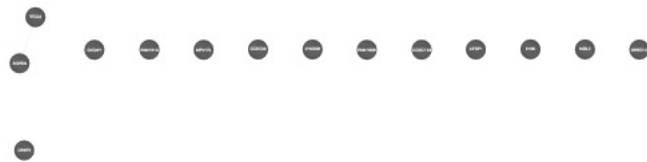

## Networks

- Consolidated-Pathways-2013
- InterPro
- Co-expression
- Physical Interactions
- Shared protein domains
- Predicted

## Functions

N/A

# Search parameters

**Organism** Homo sapiens (human)

**Genes** ENSG00000004534 , ENSG00000006042 , ENSG00000024048 , ENSG00000037757 ,  
ENSG00000048544 , ENSG00000053747 , ENSG00000054219 , ENSG00000054392 ,  
ENSG00000064115 , ENSG00000066855 , ENSG00000068745 , ENSG00000072682 ,  
ENSG00000080166 , ENSG00000080224 , ENSG00000100147 , ENSG00000100197 ,  
ENSG00000100505 , ENSG00000101134 , ENSG00000101751 , ENSG00000103274 ,  
ENSG00000106415 , ENSG00000108953 , ENSG00000111344 , ENSG00000113240 ,  
ENSG00000114744 , ENSG00000115705 , ENSG00000116406 , ENSG00000117593 ,  
ENSG00000119242 , ENSG00000120159 , ENSG00000124767 , ENSG00000125534 ,  
ENSG00000126088 , ENSG00000127995 , ENSG00000129055 , ENSG00000129226 ,  
ENSG00000129244 , ENSG00000130193 , ENSG00000130413 , ENSG00000131558 ,  
ENSG00000131845 , ENSG00000132305 , ENSG00000132823 , ENSG00000134809 ,  
ENSG00000135074 , ENSG00000135747 , ENSG00000136371 , ENSG00000136449 ,  
ENSG00000137310 , ENSG00000137563 , ENSG00000138032 , ENSG00000138363 ,  
ENSG00000138376 , ENSG00000138439 , ENSG00000138829 , ENSG00000138964 ,  
ENSG00000139921 , ENSG00000141295 , ENSG00000141504 , ENSG00000141519 ,  
ENSG00000141580 , ENSG00000141698 , ENSG00000143156 , ENSG00000145029 ,  
ENSG00000145476 , ENSG00000145725 , ENSG00000146242 , ENSG00000146733 ,  
ENSG00000146842 , ENSG00000148290 , ENSG00000148824 , ENSG00000149054 ,  
ENSG00000152404 , ENSG00000152492 , ENSG00000152910 , ENSG00000154319 ,  
ENSG00000154328 , ENSG00000156968 , ENSG00000157578 , ENSG00000159111 ,  
ENSG00000160194 , ENSG00000160284 , ENSG00000160886 , ENSG00000162613 ,  
ENSG00000163807 , ENSG00000164344 , ENSG00000164418 , ENSG00000164818 ,  
ENSG00000165621 , ENSG00000165806 , ENSG00000166275 , ENSG00000166321 ,  
ENSG00000166436 , ENSG00000166452 , ENSG00000166503 , ENSG00000166743 ,  
ENSG00000167081 , ENSG00000167311 , ENSG00000167641 , ENSG00000167653 ,  
ENSG00000169035 , ENSG00000169085 , ENSG00000169131 , ENSG00000169609 ,  
ENSG00000169629 , ENSG00000170390 , ENSG00000170909 , ENSG00000172346 ,  
ENSG00000172687 , ENSG00000173421 , ENSG00000174611 , ENSG00000175164 ,  
ENSG00000175170 , ENSG00000175806 , ENSG00000176125 , ENSG00000177595 ,  
ENSG00000177700 , ENSG00000178386 , ENSG00000178882 , ENSG00000179344 ,  
ENSG00000180398 , ENSG00000180481 , ENSG00000180611 , ENSG00000182093 ,  
ENSG00000182253 , ENSG00000182534 , ENSG00000182923 , ENSG00000183172 ,  
ENSG00000183303 , ENSG00000183891 , ENSG00000184999 , ENSG00000185290 ,  
ENSG00000185324 , ENSG00000185437 , ENSG00000186230 , ENSG00000186283 ,  
ENSG00000186448 , ENSG00000186470 , ENSG00000186792 , ENSG00000187010 ,  
ENSG00000187151 , ENSG00000187595 , ENSG00000188191 , ENSG00000189068 ,  
ENSG00000189269 , ENSG00000196126 , ENSG00000232629 , ENSG00000196653 ,  
ENSG00000196968 , ENSG00000197020 , ENSG00000197969 , ENSG00000198502 ,  
ENSG00000198951 , ENSG00000204351 , ENSG00000204531 , ENSG00000204538 ,  
ENSG00000204604 , ENSG00000204764 , ENSG00000205078 , ENSG00000205302 ,

ENSG00000205571 , ENSG00000237541 , ENSG00000234745 , ENSG00000213214 ,  
ENSG00000213672 , ENSG00000214376 , ENSG00000214435 , ENSG00000219545 ,  
ENSG00000240053 , ENSG00000241106 , ENSG00000241043 , ENSG00000254521 ,  
ENSG00000256043 , ENSG00000267508

**Network** Automatically selected weighting method  
**weighting**

**Networks** **A**

---

Abu-Odeh-Aqeilan-2014 , Agrawal-Sedivy-2010 , Aichem-Groettrup-2012 , Albers-  
Koegl-2005 , Alexandru-Deshaies-2008 , Alizadeh-Staudt-2000 , Andresen-Flores-  
Morales-2014 , Arbuckle-Grant-2010 , Arroyo-Aloy-2014 , Arroyo-Aloy-2015

**B**

---

Bahr-Bowler-2013 , Bailey-Hieter-2015 , Bandyopadhyay-Ideker-2010 , Bantscheff-  
Drewes-2011 , Barr-Knapp-2009 , Barrios-Rodiles-Wrana-2005 , Behrends-Harper-  
2010 , Behzadnia-Lührmann-2007 , Bennett-Harper-2010 , Benzinger-Hermeking-  
2005 , Berggård-James-2006 , Bett-Hay-2013 , Bhatnagar-Attie-2014 , Bild-Nevins-  
2006 B , BIOGRID-SMALL-SCALE-STUDIES , BIOGRID-SMALL-SCALE-  
STUDIES , Blandin-Richard-2013 , Blomen-Brummelkamp-2015 , Blomen-  
Brummelkamp-2015 , Bogachek-Weigel-2014 , Boldrick-Relman-2002 , Bonacci-  
Soubeyran-2014 , Bouwmeester-Supertti-Furga-2004 , Brajenovic-Drewes-2004 ,  
Brehme-Supertti-Furga-2009 , Bruderer-Hay-2011 , Burington-Shaughnessy-2008 ,  
Butland-Hayden-2014 , Byron-Humphries-2012

**C**

---

Cai-Conaway-2007 , Camargo-Brandon-2007 , Campos-Reinberg-2015 , Cao-  
Chinnaiyan-2014 , Carmon-Liu-2014 , CELL\_MAP , Chen-Brown-2002 , Chen-Ge-  
2013 , Chen-Huang-2014 , Chen-Zhang-2013 , Christianson-Kopito-2011 , Cloutier-  
Coulombe-2013 , Colland-Gauthier-2004 , Consolidated-Pathways-2013 , Corominas-  
Iakoucheva-2014 , Couzens-Gingras-2013 , Cox-Rizzino-2013 , Coyaud-Raught-2015

**D**

---

Danielsen-Nielsen-2011 , Dart-Wells-2015 , de Hoog-Mann-2004 , Diner-Cristea-  
2015 , Dobbin-Giordano-2005 , Drissi-Boisvert-2015 , Drug-interactions-2013 , Dyer-  
Sobral-2010

**E**

---

Emanuele-Elledge-2011 , Emdal-Olsen-2015 , Ewing-Figeys-2007

**F**

---

Fenner-Prehn-2010 , Floyd-Pagliarini-2016 , Foerster-Ritter-2013 , Fogeron-Lange-  
2013 , Foster-Marshall-2013 , Freibaum-Taylor-2010

**G**

---

Gabriel-Baumgrass-2016 , Galligan-Howley-2015 , Gao-Reinberg-2012 , Gautier-Hall-  
2009 , Giannone-Liu-2010 , Glatte-Gstaiger-2009 , Gloeckner-Ueffing-2007 ,  
Goehler-Wanker-2004 , Golebiowski-Hay-2009 , Goudreault-Gingras-2009 , Grant-

## G

---

2010 , Greco-Cristea-2011 , Grossmann-Stelzl-2015 , Guarani-Harper-2014 , Gupta-Pelletier-2015

## H

---

Hanson-Clayton-2014 , Hauri-Gstaiger-2013 , Havrylov-Redowicz-2009 , Havugimana-Emili-2012 , Hayes-Urbé-2012 , Hegele-Stelzl-2012 A , Hegele-Stelzl-2012 B , Hein-Mann-2015 , Hill-Livingston-2014 , HUMANCYC , Humphries-Humphries-2009 , Hutchins-Peters-2010 , Huttlin-Gygi-2015

## I

---

I2D-BIND-Fly2Human , I2D-BIND-Mouse2Human , I2D-BIND-Rat2Human , I2D-BIND-Worm2Human , I2D-BIND-Yeast2Human , I2D-BioGRID-Fly2Human , I2D-BioGRID-Mouse2Human , I2D-BioGRID-Rat2Human , I2D-BioGRID-Worm2Human , I2D-BioGRID-Yeast2Human , I2D-Chen-Pawson-2009-PiwiScreen-Mouse2Human , I2D-Formstecher-Daviet-2005-Embryo-Fly2Human , I2D-Giot-Rothbert-2003-Low-Fly2Human , I2D-INNATEDB-Mouse2Human , I2D-IntAct-Fly2Human , I2D-IntAct-Mouse2Human , I2D-IntAct-Rat2Human , I2D-IntAct-Worm2Human , I2D-IntAct-Yeast2Human , I2D-Krogan-Greenblatt-2006-Core-Yeast2Human , I2D-Krogan-Greenblatt-2006-NonCore-Yeast2Human , I2D-Li-Vidal-2004-CORE-1-Worm2Human , I2D-Li-Vidal-2004-non-core-Worm2Human , I2D-Manual-Mouse2Human , I2D-Manual-Rat2Human , I2D-MGI-Mouse2Human , I2D-MINT-Fly2Human , I2D-MINT-Mouse2Human , I2D-MINT-Rat2Human , I2D-MINT-Worm2Human , I2D-MINT-Yeast2Human , I2D-Ptacek-Snyder-2005-Yeast2Human , I2D-Tarassov-PCA-Yeast2Human , I2D-Tewari-Vidal-2004-TGFb-Worm2Human , I2D-vonMering-Bork-2002-High-Yeast2Human , I2D-vonMering-Bork-2002-Low-Yeast2Human , I2D-vonMering-Bork-2002-Medium-Yeast2Human , I2D-Wang-Orkin-2006-ESmplx-Mouse2Human , I2D-Wang-Orkin-2006-ESmplxlow-Mouse2Human , I2D-Yu-Vidal-2008-GoldStd-Yeast2Human , IMID , Ingham-Pawson-2005 , Innocenti-Brown-2011 , INTERPRO , InterPro , IREF-BIND , IREF-BIOGRID , IREF-DIP , IREF-HPRD , IREF-INTACT , IREF-MATRIXDB , IREF-MPPI , IREF-PUBMED , IREF-SMALL-SCALE-STUDIES , IREF-SMALL-SCALE-STUDIES

## J

---

Jeronimo-Coulombe-2007 , Jin-Pawson-2004 , Johnson-Kerner-Wichterle-2015 , Johnson-Shoemaker-2003 , Jones-MacBeath-2006 , Joshi-Cristea-2013 , Jäger-Krogan-2011

## K

---

Kahle-Zoghbi-2011 , Kaltenbach-Hughes-2007 , Katsogiannou-Rocchi-2014 , Kim-Gygi-2011 , Kim-Major-2015 , Kneissl-Grummt-2003 , Koch-Hermeking-2007 , Kotlyar-Jurisica-2015 , Kristensen-Foster-2012 , Kärblane-Sarmiento-2015 , Kırılı-Görlich-2015

## L

---

## L

---

Lambert-Gingras-2015 , Lamoliatte-Thibault-2014 , Lau-Ronai-2012 , Lee-Songyang-2011 , Lehner-Sanderson-2004 A , Lehner-Sanderson-2004 B , Leng-Wang-2014 , Leung-Jones-2014 , Li-Chen-2015 , Li-Dorf-2011 A , Li-Dorf-2011 B , Li-Dorf-2014 , Li-Haura-2013 , Lim-Zoghbi-2006 , Lin-Smith-2010 , Lipp-Guthrie-2015 , Liu-Wang-2012 , Llères-Lamond-2010 , Loch-Strickler-2012 , Low-Heck-2014 , Lu-Zhang-2013 , Luo-Elledge-2009

## M

---

Mak-Moffat-2010 , Mallon-McKay-2013 , Malovannaya-Qin-2010 , Markson-Sanderson-2009 , Maréchal-Zou-2014 , Matsumoto-Nakayama-2005 , McCracken-Blencowe-2005 , McFarland-Nussbaum-2008 , Meek-Piwnica-Worms-2004 , Milev-Mouland-2012 , miRNA-target-predictions-2013 , Miyamoto-Sato-Yanagawa-2010 , Murakawa-Landthaler-2015

## N

---

Nakayama-Ohara-2002 , Nakayasu-Adkins-2013 , Napolitano-Meroni-2011 , Narayan-Bennett-2012 , Nathan-Goldberg-2013 , NCI\_NATURE , Neganova-Lako-2011 , Newman-Keating-2003 , Nicholson-Hupp-2014 , Noble-Diehl-2008

## O

---

Oliviero-Cagney-2015 , Olma-Pintard-2009 , Oláh-Ovádi-2011 , Oshikawa-Nakayama-2012 , Ouyang-Gill-2009

## P

---

Panigrahi-Pati-2012 , Papp-Lamia-2015 , Perez-Hernandez-Yáñez-Mó-2013 , Perou-Botstein-1999 , Perou-Botstein-2000 , Persaud-Rotin-2009 , Petschnigg-Stagljar-2014 , PFAM , Phillips-Corn-2013 , Pichlmair-Supert-Furga-2011 , Pichlmair-Supert-Furga-2012 , Pilot-Storck-Goillot-2010 , Povlsen-Choudhary-2012

## R

---

Ramachandran-LaBaer-2004 , Raman-Harper-2015 , Ramaswamy-Golub-2001 , Ravasi-Hayashizaki-2010 , REACTOME , Reinke-Keating-2013 , Reyniers-Taymans-2014 , Richter-Chrzanowska-Lightowlers-2010 , Rieger-Chu-2004 , Rolland-Vidal-2014 , Rosenwald-Staudt-2001 , Roth-Zlotnik-2006 , Roux-Burke-2012 , Rowbotham-Mermoud-2011 , Roy-Pardo-2014 , Roy-Parent-2013 , Rual-Vidal-2005 A , Rual-Vidal-2005 B

## S

---

Sang-Jackson-2011 , Sato-Conaway-2004 , Schadt-Shoemaker-2004 , Scholz-Taylor-2016 , Singh-Moore-2012 , Smirnov-Cheung-2009 , So-Colwill-2015 , Soler-López-Aloy-2011 , Sowa-Harper-2009 , Stehling-Lill-2012 , Stehling-Lill-2013 , Stelzl-Wanker-2005 , Stes-Gevaert-2014 , Stuart-Kim-2003 , Suter-Wanker-2013

## T

---

Taipale-Lindquist-2012 , Taipale-Lindquist-2014 , Takahashi-Conaway-2011 , Tarallo-Weisz-2011 , Tatham-Hay-2011 , Teixeira-Gomes-2010 , Thalappilly-Duseti-

## **T**

---

2008 , Thompson-Luchansky-2014 , Tong-Moran-2014 , Toyoshima-Grandori-2012 ,  
Transcriptional-factor-targets-2013 , Tsai-Cristea-2012

## **U**

---

Udeshi-Carr-2012

## **V**

---

van Wijk-Timmers-2009 , Vandamme-Angrand-2011 , Varjosalo-Gstaiger-2013 ,  
Varjosalo-Supertti-Furga-2013 , Venkatesan-Vidal-2009 , Vermeulen-Mann-2010 ,  
Vinayagam-Wanker-2011 , Virok-Fülöp-2011 , Vizeacoumar-Moffat-2013

## **W**

---

Wagner-Choudhary-2011 , Wallach-Kramer-2013 , Wan-Emili-2015 , Wang-Balch-  
2006 , Wang-Cheung-2015 , Wang-He-2008 , Wang-Maris-2006 , Wang-Xu-2015 ,  
Wang-Yang-2011 , Weimann-Stelzl-2013 A , Weimann-Stelzl-2013 B , Weinmann-  
Meister-2009 , Wen-Wu-2014 , Whisenant-Salomon-2015 , Wilker-Yaffe-2007 ,  
Willingham-Muchowski-2003 , Witt-Labeit-2008 , Wong-O'Bryan-2012 , Woods-  
Monteiro-2012 , Woodsmith-Sanderson-2012 , Wu-Garvey-2007 , Wu-Li-2007 , Wu-  
Ma-2012 , Wu-Stein-2010 , Wu-Stein-2010

## **X**

---

Xiao-Lefkowitz-2007 , Xie-Cong-2013 , Xie-Green-2012 , Xu-Ye-2012

## **Y**

---

Yang-Chen-2010 , Yatim-Benkirane-2012 , Yu-Chow-2013 , Yu-Vidal-2011

## **Z**

---

Zanon-Pichler-2013 , Zhang-Shang-2006 , Zhang-Zou-2011 , Zhao-Krug-2005 , Zhao-  
Yang-2011 , Zhou-Conrads-2004 , Zhou-Hanemann-2016

# Genes

| <b>Gene</b>       | <b>Description</b>                                                                   | <b>Rank</b> |
|-------------------|--------------------------------------------------------------------------------------|-------------|
| GVQW1             | GVQW motif containing 1 [Source:HGNC Symbol;Acc:HGNC:31424]                          | N/A         |
| ZNF738            | zinc finger protein 738 [Source:HGNC Symbol;Acc:HGNC:32469]                          | N/A         |
| ZNF670-<br>ZNF695 | ZNF670-ZNF695 readthrough (NMD candidate) [Source:HGNC Symbol;Acc:HGNC:49200]        | N/A         |
| VSTM5             | V-set and transmembrane domain containing 5 [Source:HGNC Symbol;Acc:HGNC:34443]      | N/A         |
| VSTM1             | V-set and transmembrane domain containing 1 [Source:HGNC Symbol;Acc:HGNC:29455]      | N/A         |
| UFSP1             | UFM1-specific peptidase 1 (inactive) [Source:HGNC Symbol;Acc:HGNC:33821]             | N/A         |
| ZNF385C           | zinc finger protein 385C [Source:HGNC Symbol;Acc:HGNC:33722]                         | N/A         |
| RGPD8             | RANBP2-like and GRIP domain containing 8 [Source:HGNC Symbol;Acc:HGNC:9849]          | N/A         |
| FAM182B           | family with sequence similarity 182 member B [Source:HGNC Symbol;Acc:HGNC:34503]     | N/A         |
| GLIPR1L2          | GLI pathogenesis-related 1 like 2 [Source:HGNC Symbol;Acc:HGNC:28592]                | N/A         |
| KIAA1143          | KIAA1143 [Source:HGNC Symbol;Acc:HGNC:29198]                                         | N/A         |
| ARHGEF35          | Rho guanine nucleotide exchange factor 35 [Source:HGNC Symbol;Acc:HGNC:33846]        | N/A         |
| NUPR2             | nuclear protein 2, transcriptional regulator [Source:HGNC Symbol;Acc:HGNC:44164]     | N/A         |
| C8orf46           | chromosome 8 open reading frame 46 [Source:HGNC Symbol;Acc:HGNC:28498]               | N/A         |
| FAM101A           | family with sequence similarity 101 member A [Source:HGNC Symbol;Acc:HGNC:27051]     | N/A         |
| LY6G5B            | lymphocyte antigen 6 complex, locus G5B [Source:HGNC Symbol;Acc:HGNC:13931]          | N/A         |
| C15orf40          | chromosome 15 open reading frame 40 [Source:HGNC Symbol;Acc:HGNC:28443]              | N/A         |
| NEIL2             | nei like DNA glycosylase 2 [Source:HGNC Symbol;Acc:HGNC:18956]                       | N/A         |
| UMAD1             | UBAP1-MVB12-associated (UMA) domain containing 1 [Source:HGNC Symbol;Acc:HGNC:48955] | N/A         |
| CCDC36            | coiled-coil domain containing 36 [Source:HGNC Symbol;Acc:HGNC:                       | N/A         |

| <b>Gene</b> | <b>Description</b>                                                                          | <b>Rank</b> |
|-------------|---------------------------------------------------------------------------------------------|-------------|
|             | 27945]                                                                                      |             |
| ZNF285      | zinc finger protein 285 [Source:HGNC Symbol;Acc:HGNC:13079]                                 | N/A         |
| MPV17L      | MPV17 mitochondrial inner membrane protein like [Source:HGNC Symbol;Acc:HGNC:26827]         | N/A         |
| FAM117B     | family with sequence similarity 117 member B [Source:HGNC Symbol;Acc:HGNC:14440]            | N/A         |
| LY6K        | lymphocyte antigen 6 complex, locus K [Source:HGNC Symbol;Acc:HGNC:24225]                   | N/A         |
| TTC32       | tetratricopeptide repeat domain 32 [Source:HGNC Symbol;Acc:HGNC:32954]                      | N/A         |
| SMN2        | survival of motor neuron 2, centromeric [Source:HGNC Symbol;Acc:HGNC:11118]                 | N/A         |
| CCDC50      | coiled-coil domain containing 50 [Source:HGNC Symbol;Acc:HGNC:18111]                        | N/A         |
| CYP4V2      | cytochrome P450 family 4 subfamily V member 2 [Source:HGNC Symbol;Acc:HGNC:23198]           | N/A         |
| KY          | kyphoscoliosis peptidase [Source:HGNC Symbol;Acc:HGNC:26576]                                | N/A         |
| ZNF468      | zinc finger protein 468 [Source:HGNC Symbol;Acc:HGNC:33105]                                 | N/A         |
| EPHA6       | EPH receptor A6 [Source:HGNC Symbol;Acc:HGNC:19296]                                         | N/A         |
| SIGLEC12    | sialic acid binding Ig like lectin 12 (gene/pseudogene) [Source:HGNC Symbol;Acc:HGNC:15482] | N/A         |
| MB21D2      | Mab-21 domain containing 2 [Source:HGNC Symbol;Acc:HGNC:30438]                              | N/A         |
| ANGPTL5     | angiopoietin like 5 [Source:HGNC Symbol;Acc:HGNC:19705]                                     | N/A         |
| ZNF100      | zinc finger protein 100 [Source:HGNC Symbol;Acc:HGNC:12880]                                 | N/A         |
| EXOC4       | exocyst complex component 4 [Source:HGNC Symbol;Acc:HGNC:30389]                             | N/A         |
| FAM167A     | family with sequence similarity 167 member A [Source:HGNC Symbol;Acc:HGNC:15549]            | N/A         |
| CNTNAP4     | contactin associated protein like 4 [Source:HGNC Symbol;Acc:HGNC:18747]                     | N/A         |
| TCF19       | transcription factor 19 [Source:HGNC Symbol;Acc:HGNC:11629]                                 | N/A         |
| ZNF749      | zinc finger protein 749 [Source:HGNC Symbol;Acc:HGNC:32783]                                 | N/A         |
| MYCBPAP     | MYCBP associated protein [Source:HGNC Symbol;Acc:HGNC:19677]                                | N/A         |
| CCDC40      | coiled-coil domain containing 40 [Source:HGNC Symbol;Acc:HGNC:26090]                        | N/A         |



| <b>Gene</b> | <b>Description</b>                                                                                                  | <b>Rank</b> |
|-------------|---------------------------------------------------------------------------------------------------------------------|-------------|
| SMDT1       | single-pass membrane protein with aspartate rich tail 1 [Source:HGNC Symbol;Acc:HGNC:25055]                         | N/A         |
| SLC22A10    | solute carrier family 22 member 10 [Source:HGNC Symbol;Acc:HGNC:18057]                                              | N/A         |
| FUT11       | fucosyltransferase 11 [Source:HGNC Symbol;Acc:HGNC:19233]                                                           | N/A         |
| LCA5L       | LCA5L, lebercilin like [Source:HGNC Symbol;Acc:HGNC:1255]                                                           | N/A         |
| PIDD1       | p53-induced death domain protein 1 [Source:HGNC Symbol;Acc:HGNC:16491]                                              | N/A         |
| P4HA2       | prolyl 4-hydroxylase subunit alpha 2 [Source:HGNC Symbol;Acc:HGNC:8547]                                             | N/A         |
| DCLK2       | doublecortin like kinase 2 [Source:HGNC Symbol;Acc:HGNC:19002]                                                      | N/A         |
| AS3MT       | arsenite methyltransferase [Source:HGNC Symbol;Acc:HGNC:17452]                                                      | N/A         |
| STK33       | serine/threonine kinase 33 [Source:HGNC Symbol;Acc:HGNC:14568]                                                      | N/A         |
| CCDC134     | coiled-coil domain containing 134 [Source:HGNC Symbol;Acc:HGNC:26185]                                               | N/A         |
| PSORS1C2    | psoriasis susceptibility 1 candidate 2 [Source:HGNC Symbol;Acc:HGNC:17199]                                          | N/A         |
| SCRN2       | secernin 2 [Source:HGNC Symbol;Acc:HGNC:30381]                                                                      | N/A         |
| MRPL10      | mitochondrial ribosomal protein L10 [Source:HGNC Symbol;Acc:HGNC:14055]                                             | N/A         |
| SPATC1L     | spermatogenesis and centriole associated 1-like [Source:HGNC Symbol;Acc:HGNC:1298]                                  | N/A         |
| MTHFS       | 5,10-methenyltetrahydrofolate synthetase (5-formyltetrahydrofolate cyclo-ligase) [Source:HGNC Symbol;Acc:HGNC:7437] | N/A         |
| AKIP1       | A-kinase interacting protein 1 [Source:HGNC Symbol;Acc:HGNC:1170]                                                   | N/A         |
| MRI1        | methylthioribose-1-phosphate isomerase 1 [Source:HGNC Symbol;Acc:HGNC:28469]                                        | N/A         |
| OXGR1       | oxoglutarate receptor 1 [Source:HGNC Symbol;Acc:HGNC:4531]                                                          | N/A         |
| ZNF502      | zinc finger protein 502 [Source:HGNC Symbol;Acc:HGNC:23718]                                                         | N/A         |
| OSCAR       | osteoclast associated, immunoglobulin-like receptor [Source:HGNC Symbol;Acc:HGNC:29960]                             | N/A         |
| DRICH1      | aspartate rich 1 [Source:HGNC Symbol;Acc:HGNC:28031]                                                                | N/A         |
| NDUFV3      | NADH:ubiquinone oxidoreductase subunit V3 [Source:HGNC Symbol;Acc:HGNC:7719]                                        | N/A         |
| TMEM209     | transmembrane protein 209 [Source:HGNC Symbol;Acc:HGNC:                                                             | N/A         |

| <b>Gene</b> | <b>Description</b>                                                                       | <b>Rank</b> |
|-------------|------------------------------------------------------------------------------------------|-------------|
|             | 21898]                                                                                   |             |
| BORCS7      | BLOC-1 related complex subunit 7 [Source:HGNC Symbol;Acc:HGNC:23516]                     | N/A         |
| COMMD2      | COMM domain containing 2 [Source:HGNC Symbol;Acc:HGNC:24993]                             | N/A         |
| CWF19L2     | CWF19-like 2, cell cycle control ( <i>S. pombe</i> ) [Source:HGNC Symbol;Acc:HGNC:26508] | N/A         |
| ZNF215      | zinc finger protein 215 [Source:HGNC Symbol;Acc:HGNC:13007]                              | N/A         |
| PSPH        | phosphoserine phosphatase [Source:HGNC Symbol;Acc:HGNC:9577]                             | N/A         |
| RHD         | Rh blood group D antigen [Source:HGNC Symbol;Acc:HGNC:10009]                             | N/A         |
| DCT         | dopachrome tautomerase [Source:HGNC Symbol;Acc:HGNC:2709]                                | N/A         |
| OR5P2       | olfactory receptor family 5 subfamily P member 2 [Source:HGNC Symbol;Acc:HGNC:14783]     | N/A         |
| MSRA        | methionine sulfoxide reductase A [Source:HGNC Symbol;Acc:HGNC:7377]                      | N/A         |
| GRIK2       | glutamate ionotropic receptor kainate type subunit 2 [Source:HGNC Symbol;Acc:HGNC:4580]  | N/A         |
| TMEM98      | transmembrane protein 98 [Source:HGNC Symbol;Acc:HGNC:24529]                             | N/A         |
| GLCCI1      | glucocorticoid induced 1 [Source:HGNC Symbol;Acc:HGNC:18713]                             | N/A         |
| RASAL1      | RAS protein activator like 1 [Source:HGNC Symbol;Acc:HGNC:9873]                          | N/A         |
| ZNF304      | zinc finger protein 304 [Source:HGNC Symbol;Acc:HGNC:13505]                              | N/A         |
| MRPS10      | mitochondrial ribosomal protein S10 [Source:HGNC Symbol;Acc:HGNC:14502]                  | N/A         |
| NICN1       | nicolin 1 [Source:HGNC Symbol;Acc:HGNC:18317]                                            | N/A         |
| ART5        | ADP-ribosyltransferase 5 [Source:HGNC Symbol;Acc:HGNC:24049]                             | N/A         |
| IP6K2       | inositol hexakisphosphate kinase 2 [Source:HGNC Symbol;Acc:HGNC:17313]                   | N/A         |
| ACSM1       | acyl-CoA synthetase medium-chain family member 1 [Source:HGNC Symbol;Acc:HGNC:18049]     | N/A         |
| MXRA7       | matrix remodeling associated 7 [Source:HGNC Symbol;Acc:HGNC:7541]                        | N/A         |
| NT5C3B      | 5'-nucleotidase, cytosolic IIIB [Source:HGNC Symbol;Acc:HGNC:28300]                      | N/A         |
| THEM6       | thioesterase superfamily member 6 [Source:HGNC Symbol;Acc:HGNC:29656]                    | N/A         |
| HYAL3       | hyaluronoglucosaminidase 3 [Source:HGNC Symbol;Acc:HGNC:5322]                            | N/A         |

| <b>Gene</b> | <b>Description</b>                                                                                                                                            | <b>Rank</b> |
|-------------|---------------------------------------------------------------------------------------------------------------------------------------------------------------|-------------|
| RANBP17     | RAN binding protein 17 [Source:HGNC Symbol;Acc:HGNC:14428]                                                                                                    | N/A         |
| NUDT13      | nudix hydrolase 13 [Source:HGNC Symbol;Acc:HGNC:18827]                                                                                                        | N/A         |
| ABO         | ABO blood group (transferase A, alpha 1-3-N-acetylgalactosaminyltransferase; transferase B, alpha 1-3-galactosyltransferase) [Source:HGNC Symbol;Acc:HGNC:79] | N/A         |
| OSER1       | oxidative stress responsive serine rich 1 [Source:HGNC Symbol;Acc:HGNC:16105]                                                                                 | N/A         |
| ZNF223      | zinc finger protein 223 [Source:HGNC Symbol;Acc:HGNC:13016]                                                                                                   | N/A         |
| PSCA        | prostate stem cell antigen [Source:HGNC Symbol;Acc:HGNC:9500]                                                                                                 | N/A         |
| TM7SF3      | transmembrane 7 superfamily member 3 [Source:HGNC Symbol;Acc:HGNC:23049]                                                                                      | N/A         |
| LY75        | lymphocyte antigen 75 [Source:HGNC Symbol;Acc:HGNC:6729]                                                                                                      | N/A         |
| HHAT        | hedgehog acyltransferase [Source:HGNC Symbol;Acc:HGNC:18270]                                                                                                  | N/A         |
| TIMM10      | translocase of inner mitochondrial membrane 10 homolog (yeast) [Source:HGNC Symbol;Acc:HGNC:11814]                                                            | N/A         |
| VPS13A      | vacuolar protein sorting 13 homolog A [Source:HGNC Symbol;Acc:HGNC:1908]                                                                                      | N/A         |
| NME7        | NME/NM23 family member 7 [Source:HGNC Symbol;Acc:HGNC:20461]                                                                                                  | N/A         |
| PRKAR1B     | protein kinase cAMP-dependent type I regulatory subunit beta [Source:HGNC Symbol;Acc:HGNC:9390]                                                               | N/A         |
| CYP2D6      | cytochrome P450 family 2 subfamily D member 6 [Source:HGNC Symbol;Acc:HGNC:2625]                                                                              | N/A         |
| SAT2        | spermidine/spermine N1-acetyltransferase family member 2 [Source:HGNC Symbol;Acc:HGNC:23160]                                                                  | N/A         |
| PPP1R14A    | protein phosphatase 1 regulatory inhibitor subunit 14A [Source:HGNC Symbol;Acc:HGNC:14871]                                                                    | N/A         |
| TOR3A       | torsin family 3 member A [Source:HGNC Symbol;Acc:HGNC:11997]                                                                                                  | N/A         |
| KLKB1       | kallikrein B1 [Source:HGNC Symbol;Acc:HGNC:6371]                                                                                                              | N/A         |
| SYCE1L      | synaptonemal complex central element protein 1 like [Source:HGNC Symbol;Acc:HGNC:37236]                                                                       | N/A         |
| EDEM3       | ER degradation enhancing alpha-mannosidase like protein 3 [Source:HGNC Symbol;Acc:HGNC:16787]                                                                 | N/A         |
| MTFR1       | mitochondrial fission regulator 1 [Source:HGNC Symbol;Acc:HGNC:29510]                                                                                         | N/A         |
| TRIM9       | tripartite motif containing 9 [Source:HGNC Symbol;Acc:HGNC:16288]                                                                                             | N/A         |

| <b>Gene</b> | <b>Description</b>                                                                                      | <b>Rank</b> |
|-------------|---------------------------------------------------------------------------------------------------------|-------------|
| ZNF197      | zinc finger protein 197 [Source:HGNC Symbol;Acc:HGNC:12988]                                             | N/A         |
| MTG1        | mitochondrial ribosome associated GTPase 1 [Source:HGNC Symbol;Acc:HGNC:32159]                          | N/A         |
| CDK10       | cyclin dependent kinase 10 [Source:HGNC Symbol;Acc:HGNC:1770]                                           | N/A         |
| KLK7        | kallikrein related peptidase 7 [Source:HGNC Symbol;Acc:HGNC:6368]                                       | N/A         |
| CSDC2       | cold shock domain containing C2 [Source:HGNC Symbol;Acc:HGNC:30359]                                     | N/A         |
| PPM1B       | protein phosphatase, Mg <sup>2+</sup> /Mn <sup>2+</sup> dependent 1B [Source:HGNC Symbol;Acc:HGNC:9276] | N/A         |
| FBN2        | fibrillin 2 [Source:HGNC Symbol;Acc:HGNC:3604]                                                          | N/A         |
| POLR2L      | polymerase (RNA) II subunit L [Source:HGNC Symbol;Acc:HGNC:9199]                                        | N/A         |
| ANAPC13     | anaphase promoting complex subunit 13 [Source:HGNC Symbol;Acc:HGNC:24540]                               | N/A         |
| CLK4        | CDC like kinase 4 [Source:HGNC Symbol;Acc:HGNC:13659]                                                   | N/A         |
| LAMA3       | laminin subunit alpha 3 [Source:HGNC Symbol;Acc:HGNC:6483]                                              | N/A         |
| MCFD2       | multiple coagulation factor deficiency 2 [Source:HGNC Symbol;Acc:HGNC:18451]                            | N/A         |
| SH3BGR      | SH3 domain binding glutamate rich protein [Source:HGNC Symbol;Acc:HGNC:10822]                           | N/A         |
| BTN3A2      | butyrophilin subfamily 3 member A2 [Source:HGNC Symbol;Acc:HGNC:1139]                                   | N/A         |
| PPDPF       | pancreatic progenitor cell differentiation and proliferation factor [Source:HGNC Symbol;Acc:HGNC:16142] | N/A         |
| CASD1       | CAS1 domain containing 1 [Source:HGNC Symbol;Acc:HGNC:16014]                                            | N/A         |
| UROD        | uroporphyrinogen decarboxylase [Source:HGNC Symbol;Acc:HGNC:12591]                                      | N/A         |
| TPBG        | trophoblast glycoprotein [Source:HGNC Symbol;Acc:HGNC:12004]                                            | N/A         |
| DNAAF5      | dynein (axonemal) assembly factor 5 [Source:HGNC Symbol;Acc:HGNC:26013]                                 | N/A         |
| PARVG       | parvin gamma [Source:HGNC Symbol;Acc:HGNC:14654]                                                        | N/A         |
| NCKIPSD     | NCK interacting protein with SH3 domain [Source:HGNC Symbol;Acc:HGNC:15486]                             | N/A         |
| FUBP1       | far upstream element binding protein 1 [Source:HGNC Symbol;Acc:HGNC:4004]                               | N/A         |

| <b>Gene</b>   | <b>Description</b>                                                                                   | <b>Rank</b> |
|---------------|------------------------------------------------------------------------------------------------------|-------------|
| NAGA          | alpha-N-acetylgalactosaminidase [Source:HGNC Symbol;Acc:HGNC:7631]                                   | N/A         |
| ADAM19        | ADAM metallopeptidase domain 19 [Source:HGNC Symbol;Acc:HGNC:197]                                    | N/A         |
| SNX2          | sorting nexin 2 [Source:HGNC Symbol;Acc:HGNC:11173]                                                  | N/A         |
| CTSO          | cathepsin O [Source:HGNC Symbol;Acc:HGNC:2542]                                                       | N/A         |
| TMX1          | thioredoxin related transmembrane protein 1 [Source:HGNC Symbol;Acc:HGNC:15487]                      | N/A         |
| CCDC92        | coiled-coil domain containing 92 [Source:HGNC Symbol;Acc:HGNC:29563]                                 | N/A         |
| CEP63         | centrosomal protein 63 [Source:HGNC Symbol;Acc:HGNC:25815]                                           | N/A         |
| DARS2         | aspartyl-tRNA synthetase 2, mitochondrial [Source:HGNC Symbol;Acc:HGNC:25538]                        | N/A         |
| ZNF354A       | zinc finger protein 354A [Source:HGNC Symbol;Acc:HGNC:11628]                                         | N/A         |
| CD68          | CD68 molecule [Source:HGNC Symbol;Acc:HGNC:1693]                                                     | N/A         |
| RP11-382A20.3 | Hepatoma-derived growth factor-related protein 3 [Source:UniProtKB/Swiss-Prot;Acc:Q9Y3E1]            | N/A         |
| GLO1          | glyoxalase I [Source:HGNC Symbol;Acc:HGNC:4323]                                                      | N/A         |
| SURF1         | surfeit 1 [Source:HGNC Symbol;Acc:HGNC:11474]                                                        | N/A         |
| POLI          | polymerase (DNA) iota [Source:HGNC Symbol;Acc:HGNC:9182]                                             | N/A         |
| ATP1B2        | ATPase Na <sup>+</sup> /K <sup>+</sup> transporting subunit beta 2 [Source:HGNC Symbol;Acc:HGNC:805] | N/A         |
| TRIM66        | tripartite motif containing 66 [Source:HGNC Symbol;Acc:HGNC:29005]                                   | N/A         |
| SYNM          | synemin [Source:HGNC Symbol;Acc:HGNC:24466]                                                          | N/A         |
| DOK5          | docking protein 5 [Source:HGNC Symbol;Acc:HGNC:16173]                                                | N/A         |
| WDR45B        | WD repeat domain 45B [Source:HGNC Symbol;Acc:HGNC:25072]                                             | N/A         |
| IMMT          | inner membrane mitochondrial protein [Source:HGNC Symbol;Acc:HGNC:6047]                              | N/A         |
| UBR2          | ubiquitin protein ligase E3 component n-recognin 2 [Source:HGNC Symbol;Acc:HGNC:21289]               | N/A         |
| POU5F1        | POU class 5 homeobox 1 [Source:HGNC Symbol;Acc:HGNC:9221]                                            | N/A         |
| NUBP1         | nucleotide binding protein 1 [Source:HGNC Symbol;Acc:HGNC:8041]                                      | N/A         |
| WRB           | tryptophan rich basic protein [Source:HGNC Symbol;Acc:HGNC:12790]                                    | N/A         |
| PPIP5K2       | diphosphoinositol pentakisphosphate kinase 2 [Source:HGNC Symbol;                                    | N/A         |

| <b>Gene</b> | <b>Description</b>                                                                                                   | <b>Rank</b> |
|-------------|----------------------------------------------------------------------------------------------------------------------|-------------|
|             | Acc:HGNC:29035]                                                                                                      |             |
| GGH         | gamma-glutamyl hydrolase [Source:HGNC Symbol;Acc:HGNC:4248]                                                          | N/A         |
| CAAP1       | caspase activity and apoptosis inhibitor 1 [Source:HGNC Symbol;Acc:HGNC:25834]                                       | N/A         |
| SKIV2L      | Ski2 like RNA helicase [Source:HGNC Symbol;Acc:HGNC:10898]                                                           | N/A         |
| PBX3        | PBX homeobox 3 [Source:HGNC Symbol;Acc:HGNC:8634]                                                                    | N/A         |
| CASP7       | caspase 7 [Source:HGNC Symbol;Acc:HGNC:1508]                                                                         | N/A         |
| YWHAE       | tyrosine 3-monooxygenase/tryptophan 5-monooxygenase activation protein epsilon [Source:HGNC Symbol;Acc:HGNC:12851]   | N/A         |
| RBM6        | RNA binding motif protein 6 [Source:HGNC Symbol;Acc:HGNC:9903]                                                       | N/A         |
| ATIC        | 5-aminoimidazole-4-carboxamide ribonucleotide formyltransferase/IMP cyclohydrolase [Source:HGNC Symbol;Acc:HGNC:794] | N/A         |
| TPO         | thyroid peroxidase [Source:HGNC Symbol;Acc:HGNC:12015]                                                               | N/A         |
| BARD1       | BRCA1 associated RING domain 1 [Source:HGNC Symbol;Acc:HGNC:952]                                                     | N/A         |
| HLA-B       | major histocompatibility complex, class I, B [Source:HGNC Symbol;Acc:HGNC:4932]                                      | N/A         |
| HLA-DQB2    | major histocompatibility complex, class II, DQ beta 2 [Source:HGNC Symbol;Acc:HGNC:4945]                             | N/A         |
| HLA-DOB     | major histocompatibility complex, class II, DO beta [Source:HGNC Symbol;Acc:HGNC:4937]                               | N/A         |
| HLA-DQA2    | major histocompatibility complex, class II, DQ alpha 2 [Source:HGNC Symbol;Acc:HGNC:4943]                            | N/A         |
| HLA-DRB5    | major histocompatibility complex, class II, DR beta 5 [Source:HGNC Symbol;Acc:HGNC:4953]                             | N/A         |
| HLA-DQB1    | major histocompatibility complex, class II, DQ beta 1 [Source:HGNC Symbol;Acc:HGNC:4944]                             | N/A         |
| HLA-DRB1    | major histocompatibility complex, class II, DR beta 1 [Source:HGNC Symbol;Acc:HGNC:4948]                             | N/A         |
| HLA-DRB3    | major histocompatibility complex, class II, DR beta 3 [Source:HGNC Symbol;Acc:HGNC:4951]                             | 1           |
| HLA-DRB4    | major histocompatibility complex, class II, DR beta 4 [Source:HGNC Symbol;Acc:HGNC:4952]                             | 2           |
| HLA-DPB1    | major histocompatibility complex, class II, DP beta 1 [Source:HGNC Symbol;Acc:HGNC:4940]                             | 3           |
| HLA-DMB     | major histocompatibility complex, class II, DM beta [Source:HGNC                                                     | 4           |

| Gene              | Description                                                                               | Rank |
|-------------------|-------------------------------------------------------------------------------------------|------|
|                   | Symbol;Acc:HGNC:4935]                                                                     |      |
| XXbac-BPG246D15.9 |                                                                                           | 5    |
| HLA-DQA1          | major histocompatibility complex, class II, DQ alpha 1 [Source:HGNC Symbol;Acc:HGNC:4942] | 6    |
| HLA-DRA           | major histocompatibility complex, class II, DR alpha [Source:HGNC Symbol;Acc:HGNC:4947]   | 7    |
| HLA-DPA1          | major histocompatibility complex, class II, DP alpha 1 [Source:HGNC Symbol;Acc:HGNC:4938] | 8    |
| XXbac-BPG181M17.5 |                                                                                           | 9    |
| HLA-DMA           | major histocompatibility complex, class II, DM alpha [Source:HGNC Symbol;Acc:HGNC:4934]   | 10   |
| HLA-DOA           | major histocompatibility complex, class II, DO alpha [Source:HGNC Symbol;Acc:HGNC:4936]   | 11   |
| HLA-F             | major histocompatibility complex, class I, F [Source:HGNC Symbol;Acc:HGNC:4963]           | 12   |
| HLA-C             | major histocompatibility complex, class I, C [Source:HGNC Symbol;Acc:HGNC:4933]           | 13   |
| HLA-A             | major histocompatibility complex, class I, A [Source:HGNC Symbol;Acc:HGNC:4931]           | 14   |
| HLA-G             | major histocompatibility complex, class I, G [Source:HGNC Symbol;Acc:HGNC:4964]           | 15   |
| HLA-E             | major histocompatibility complex, class I, E [Source:HGNC Symbol;Acc:HGNC:4962]           | 16   |
| CD3E              | CD3e molecule [Source:HGNC Symbol;Acc:HGNC:1674]                                          | 17   |
| CD4               | CD4 molecule [Source:HGNC Symbol;Acc:HGNC:1678]                                           | 18   |
| LCK               | LCK proto-oncogene, Src family tyrosine kinase [Source:HGNC Symbol;Acc:HGNC:6524]         | 19   |
| CD3G              | CD3g molecule [Source:HGNC Symbol;Acc:HGNC:1675]                                          | 20   |
| CD3D              | CD3d molecule [Source:HGNC Symbol;Acc:HGNC:1673]                                          | 21   |
| HFE               | hemochromatosis [Source:HGNC Symbol;Acc:HGNC:4886]                                        | 22   |
| MR1               | major histocompatibility complex, class I-related [Source:HGNC Symbol;Acc:HGNC:4975]      | 23   |
| FCGRT             | Fc fragment of IgG receptor and transporter [Source:HGNC Symbol;Acc:HGNC:3621]            | 24   |
| AZGP1             | alpha-2-glycoprotein 1, zinc-binding [Source:HGNC Symbol;Acc:                             | 25   |

| <b>Gene</b> | <b>Description</b>                                                  | <b>Rank</b> |
|-------------|---------------------------------------------------------------------|-------------|
|             | HGNC:910]                                                           |             |
| GZMB        | granzyme B [Source:HGNC Symbol;Acc:HGNC:4709]                       | 26          |
| PRF1        | perforin 1 [Source:HGNC Symbol;Acc:HGNC:9360]                       | 27          |
| B2M         | beta-2-microglobulin [Source:HGNC Symbol;Acc:HGNC:914]              | 28          |
| CD80        | CD80 molecule [Source:HGNC Symbol;Acc:HGNC:1700]                    | 29          |
| FAS         | Fas cell surface death receptor [Source:HGNC Symbol;Acc:HGNC:11920] | 30          |



# Networks

|                                                                                                                                                                                                                                   |        |
|-----------------------------------------------------------------------------------------------------------------------------------------------------------------------------------------------------------------------------------|--------|
| <b>Consolidated-Pathways-2013</b>                                                                                                                                                                                                 | 46.15% |
| Autoimmune thyroid disease                                                                                                                                                                                                        | 6.74%  |
| Translocation of ZAP-70 to ...                                                                                                                                                                                                    | 6.60%  |
| Phosphorylation of CD3 and ...                                                                                                                                                                                                    | 5.39%  |
| PD-1 signaling                                                                                                                                                                                                                    | 4.93%  |
| Allograft rejection                                                                                                                                                                                                               | 4.19%  |
| Graft-versus-host disease                                                                                                                                                                                                         | 3.92%  |
| Type I diabetes mellitus                                                                                                                                                                                                          | 3.60%  |
| Asthma                                                                                                                                                                                                                            | 3.07%  |
| Interferon gamma signaling                                                                                                                                                                                                        | 2.97%  |
| Generation of second messenger ...                                                                                                                                                                                                | 2.80%  |
| Downstream TCR signaling                                                                                                                                                                                                          | 1.93%  |
| <b>InterPro</b>                                                                                                                                                                                                                   | 36.58% |
| MHC_II_b_N                                                                                                                                                                                                                        | 16.44% |
| Ig/MHC_CS                                                                                                                                                                                                                         | 7.26%  |
| MHC_I/II-like_Ag-recog                                                                                                                                                                                                            | 6.82%  |
| Ig_C1-set                                                                                                                                                                                                                         | 6.06%  |
| <b>Co-expression</b>                                                                                                                                                                                                              | 13.20% |
| Mallon-McKay-2013                                                                                                                                                                                                                 | 2.25%  |
| StemCellDB: the human pluripotent stem cell database at the National Institutes of Health. Mallon et al (2013). <i>Stem Cell Res</i><br>Co-expression with 585,265 interactions from GEO                                          |        |
| Chen-Brown-2002                                                                                                                                                                                                                   | 1.62%  |
| Gene expression patterns in human liver cancers. Chen et al (2002). <i>Mol Biol Cell</i><br>Co-expression with 282,241 interactions from supplementary material                                                                   |        |
| Noble-Diehl-2008                                                                                                                                                                                                                  | 1.60%  |
| Regional variation in gene expression in the healthy colon is dysregulated in ulcerative colitis. Noble et al (2008). <i>Gut</i><br>Co-expression with 661,539 interactions from GEO                                              |        |
| Rosenwald-Staudt-2001                                                                                                                                                                                                             | 1.25%  |
| Relation of gene expression phenotype to immunoglobulin mutation genotype in B cell chronic lymphocytic leukemia. Rosenwald et al (2001). <i>J Exp Med</i><br>Co-expression with 114,694 interactions from supplementary material |        |

| <b>Co-expression</b>                                                                                                                                                                                    | <b>13.20%</b> |
|---------------------------------------------------------------------------------------------------------------------------------------------------------------------------------------------------------|---------------|
| <b>Wang-Cheung-2015</b>                                                                                                                                                                                 | <b>1.17%</b>  |
| Genetic variation in insulin-induced kinase signaling. Wang et al (2015). <i>Mol Syst Biol</i>                                                                                                          |               |
| Co-expression with 411,047 interactions from GEO                                                                                                                                                        |               |
| <b>Alizadeh-Staudt-2000</b>                                                                                                                                                                             | <b>0.90%</b>  |
| Distinct types of diffuse large B-cell lymphoma identified by gene expression profiling. Alizadeh et al (2000). <i>Nature</i>                                                                           |               |
| Co-expression with 90,336 interactions from supplementary material                                                                                                                                      |               |
| <b>Burington-Shaughnessy-2008</b>                                                                                                                                                                       | <b>0.89%</b>  |
| Tumor cell gene expression changes following short-term in vivo exposure to single agent chemotherapeutics are related to survival in multiple myeloma. Burington et al (2008). <i>Clin Cancer Res</i>  |               |
| Co-expression with 290,538 interactions from GEO                                                                                                                                                        |               |
| <b>Smirnov-Cheung-2009</b>                                                                                                                                                                              | <b>0.87%</b>  |
| Genetic analysis of radiation-induced changes in human gene expression. Smirnov et al (2009). <i>Nature</i>                                                                                             |               |
| Co-expression with 461,500 interactions from GEO                                                                                                                                                        |               |
| <b>Bahr-Bowler-2013</b>                                                                                                                                                                                 | <b>0.71%</b>  |
| Peripheral blood mononuclear cell gene expression in chronic obstructive pulmonary disease. Bahr et al (2013). <i>Am J Respir Cell Mol Biol</i>                                                         |               |
| Co-expression with 274,949 interactions from GEO                                                                                                                                                        |               |
| <b>Perou-Botstein-2000</b>                                                                                                                                                                              | <b>0.52%</b>  |
| Molecular portraits of human breast tumours. Perou et al (2000). <i>Nature</i>                                                                                                                          |               |
| Co-expression with 185,068 interactions from supplementary material                                                                                                                                     |               |
| <b>Bild-Nevins-2006 B</b>                                                                                                                                                                               | <b>0.49%</b>  |
| Oncogenic pathway signatures in human cancers as a guide to targeted therapies. Bild et al (2006). <i>Nature</i>                                                                                        |               |
| Co-expression with 280,683 interactions from GEO                                                                                                                                                        |               |
| <b>Innocenti-Brown-2011</b>                                                                                                                                                                             | <b>0.43%</b>  |
| Identification, replication, and functional fine-mapping of expression quantitative trait loci in primary human liver tissue. Innocenti et al (2011). <i>PLoS Genet</i>                                 |               |
| Co-expression with 603,765 interactions from GEO                                                                                                                                                        |               |
| <b>Wu-Garvey-2007</b>                                                                                                                                                                                   | <b>0.36%</b>  |
| The effect of insulin on expression of genes and biochemical pathways in human skeletal muscle. Wu et al (2007). <i>Endocrine</i>                                                                       |               |
| Co-expression with 267,109 interactions from GEO                                                                                                                                                        |               |
| <b>Dobbin-Giordano-2005</b>                                                                                                                                                                             | <b>0.11%</b>  |
| Interlaboratory comparability study of cancer gene expression analysis using oligonucleotide microarrays. Dobbin et al (2005). <i>Clin Cancer Res</i>                                                   |               |
| Co-expression with 444,931 interactions from GEO                                                                                                                                                        |               |
| <b>Wang-Maris-2006</b>                                                                                                                                                                                  | <b>0.03%</b>  |
| Integrative genomics identifies distinct molecular classes of neuroblastoma and shows that multiple genes are targeted by regional alterations in DNA copy number. Wang et al (2006). <i>Cancer Res</i> |               |
| Co-expression with 264,023 interactions from GEO                                                                                                                                                        |               |
| <b>Physical Interactions</b>                                                                                                                                                                            | <b>3.49%</b>  |
| <b>Camargo-Brandon-2007</b>                                                                                                                                                                             | <b>1.55%</b>  |

|                                                                                                                                                                                             |              |
|---------------------------------------------------------------------------------------------------------------------------------------------------------------------------------------------|--------------|
| <b>Physical Interactions</b>                                                                                                                                                                | <b>3.49%</b> |
| <b>Camargo-Brandon-2007</b>                                                                                                                                                                 |              |
| Disrupted in Schizophrenia 1 Interactome: evidence for the close connectivity of risk genes and a potential synaptic basis for schizophrenia. Camargo et al (2007). <i>Mol Psychiatry</i>   |              |
| Physical Interactions with 267 interactions from iRefIndex                                                                                                                                  |              |
| <b>Woods-Monteiro-2012</b>                                                                                                                                                                  | <b>0.62%</b> |
| Charting the landscape of tandem BRCT domain-mediated protein interactions. Woods et al (2012). <i>Sci Signal</i>                                                                           |              |
| Physical Interactions with 919 interactions from iRefIndex                                                                                                                                  |              |
| <b>Oliviero-Cagney-2015</b>                                                                                                                                                                 | <b>0.60%</b> |
| The variant Polycomb Repressor Complex 1 component PCGF1 interacts with a pluripotency sub-network that includes DPPA4, a regulator of embryogenesis. Oliviero et al (2015). <i>Sci Rep</i> |              |
| Physical Interactions with 675 interactions from BioGRID                                                                                                                                    |              |
| <b>Huttlin-Gygi-2015</b>                                                                                                                                                                    | <b>0.45%</b> |
| The BioPlex Network: A Systematic Exploration of the Human Interactome. Huttlin et al (2015). <i>Cell</i>                                                                                   |              |
| Physical Interactions with 23,399 interactions from BioGRID                                                                                                                                 |              |
| <b>IREF-HPRD</b>                                                                                                                                                                            | <b>0.20%</b> |
| Physical Interactions with 34,206 interactions from iRefIndex                                                                                                                               |              |
| <b>IREF-SMALL-SCALE-STUDIES</b>                                                                                                                                                             | <b>0.07%</b> |
| Physical Interactions with 71,996 interactions from iRefIndex                                                                                                                               |              |
| <b>Shared protein domains</b>                                                                                                                                                               | <b>0.40%</b> |
| <b>INTERPRO</b>                                                                                                                                                                             | <b>0.40%</b> |
| Shared protein domains with 608,863 interactions from InterPro                                                                                                                              |              |
| <b>Predicted</b>                                                                                                                                                                            | <b>0.19%</b> |
| <b>Stuart-Kim-2003</b>                                                                                                                                                                      | <b>0.19%</b> |
| A gene-coexpression network for global discovery of conserved genetic modules. Stuart et al (2003). <i>Science</i>                                                                          |              |
| Predicted with 24,872 interactions from supplementary material                                                                                                                              |              |
